# Supplementary material
Source: Springer Nature journal article supplement (https://www.springermedizin.de/resource/supplementary/12960_2011_279_MOESM1_ESM.pdf/9569844)
Supplement: MOESM1 [file 9569844]

## Reviewed articles on HRIS implementation processes (peer reviewed and grey literature)

| Article no. | Country no. | Country            | Title                                                                                                                                                                                | Author/Publisher                                                                                  | Source                                                                                                                                                                                                                                                                                          | Year |
|-------------|-------------|--------------------|--------------------------------------------------------------------------------------------------------------------------------------------------------------------------------------|---------------------------------------------------------------------------------------------------|-------------------------------------------------------------------------------------------------------------------------------------------------------------------------------------------------------------------------------------------------------------------------------------------------|------|
| 1           | 1           | Afghanistan        | <i>Afghanistan Health Information System: Review and Assessment</i>                                                                                                                  | WHO Health Metrics Network                                                                        | <a href="http://www.who.int/healthmetrics/en/">http://www.who.int/healthmetrics/en/</a>                                                                                                                                                                                                         | 2007 |
| 2           | 2           | Albania            | <i>Assessment of the health information system in Albania</i>                                                                                                                        | WHO Health Metrics Network                                                                        | <a href="http://www.who.int/healthmetrics/en/">http://www.who.int/healthmetrics/en/</a>                                                                                                                                                                                                         | 2008 |
| 3           | 3           | Angola             | <i>Angola Health System Assessment</i>                                                                                                                                               | Connor C, Rajkotia Y, Lin Ya-Shin, et al. Partners for Health Reform.                             | <a href="http://www.healthsystems2020.org/files/1672_file_Tech079_fin.pdf">www.healthsystems2020.org/files/1672_file_Tech079_fin.pdf</a>                                                                                                                                                        | 2005 |
| 4           | 3           | Angola             | <i>Evaluation on the use and sources of HRH data in Angola</i>                                                                                                                       | European Commission                                                                               | European Commission. PALOP Initiative (African Countries of Portuguese Official Language)                                                                                                                                                                                                       | 2009 |
| 5           | 4           | Armenia            | <i>Assessment report health information system of the Republic of Armenia</i>                                                                                                        | WHO Health Metrics Network                                                                        | <a href="http://www.who.int/healthmetrics/en/">http://www.who.int/healthmetrics/en/</a>                                                                                                                                                                                                         | 2007 |
| 6           | 5           | Azerbaijan         | <i>Assessment of National Health Information System in Azerbaijan</i>                                                                                                                | WHO Health Metrics Network                                                                        | <a href="http://www.who.int/healthmetrics/en/">http://www.who.int/healthmetrics/en/</a>                                                                                                                                                                                                         | 2008 |
| 7           | 6           | Benin              | <i>Evaluation du systeme national d'information et de gestion sanitaires (SNIOS) du Benin</i>                                                                                        | WHO Health Metrics Network                                                                        | <a href="http://www.who.int/healthmetrics/en/">http://www.who.int/healthmetrics/en/</a>                                                                                                                                                                                                         | 2007 |
| 8           | 7           | Brazil             | <i>Use of administrative data sources for health workforce analysis</i>                                                                                                              | McQuide P, Settle D, Abubaker W, et al                                                            | WHO <i>Handbook on Monitoring and Evaluation of Human Resources for Health: With Special Applications for Low and Middle Income Countries</i> , <a href="http://whqlibdoc.who.int/publications/2009/9789241547703_eng.pdf">http://whqlibdoc.who.int/publications/2009/9789241547703_eng.pdf</a> | 2009 |
| 9           | 7           | Brazil             | <i>Brazil Ministry of Health - descriptions of CONRPOF (professional councils database) and SIGTRABALHO (health workforce database)</i>                                              | Brazil Ministry of Health                                                                         | <a href="http://portal2.saude.gov.br/portal/saude/profissional/area.cfm?id_area=1293">http://portal2.saude.gov.br/portal/saude/profissional/area.cfm?id_area=1293</a>                                                                                                                           | n.d. |
| 10          | 7           | Brazil             | <i>A informacao para a gestao local de recursos humanos da saude: o sistema de informacao e gestao de recursos humanos em saude (SIG-RHS)</i>                                        | Dal Poz, MR                                                                                       | <a href="http://www.obsnetims.org.br/adm/arq/artigo/346063.PDF">http://www.obsnetims.org.br/adm/arq/artigo/346063.PDF</a>                                                                                                                                                                       | n.d. |
| 11          | 7           | Brazil             | <i>Avaliacao de processo na implementacao de politicas publicas: a implantacao do sistema de informacao e gestao humanos em saude (SIG-RHS) no contexto das reformas sectoriais.</i> | Pierantoni CR, Vianna AL, Faculdade de Medicina da Universidade de São Paulo                      | <i>Physis: Revista de Saúde Coletiva</i> 2003; 13 no.1 Rio de Janeiro Jan./June 2003; <a href="http://www.scielo.br/scielo.php?pid=S0103-73312003000100004&amp;script=sci_arttext">http://www.scielo.br/scielo.php?pid=S0103-73312003000100004&amp;script=sci_arttext</a>                       | 2003 |
| 12          | 7           | Brazil             | <i>Brazil Ministry of Health - Report on Mercosur for Health Work (Annex I : data collection form for health worker database)</i>                                                    | Brazil Ministry of Health                                                                         | <a href="http://portal2.saude.gov.br/portal/arquivos/pdf/cartmercosulespanhol.pdf">http://portal2.saude.gov.br/portal/arquivos/pdf/cartmercosulespanhol.pdf</a>                                                                                                                                 | 2006 |
| 13          | 8           | Burkina Faso       | <i>Reseau de metrologie sanitaire d'evaluation du systeme d'information sanitaire</i>                                                                                                | WHO Health Metrics Network                                                                        | <a href="http://www.who.int/healthmetrics/en/">http://www.who.int/healthmetrics/en/</a>                                                                                                                                                                                                         | 2008 |
| 14          | 9           | Burundi            | <i>Rapport d'évaluation du Système d'Information Sanitaire à l'aide de l'outil HMN</i>                                                                                               | WHO Health Metrics Network                                                                        | <a href="http://www.who.int/healthmetrics/en/">http://www.who.int/healthmetrics/en/</a>                                                                                                                                                                                                         | 2008 |
| 15          | 10          | Cambodia           | <i>Cambodia Health Information System: Review and assessment</i>                                                                                                                     | WHO Health Metrics Network                                                                        | <a href="http://www.who.int/healthmetrics/en/">http://www.who.int/healthmetrics/en/</a>                                                                                                                                                                                                         | 2007 |
| 16          | 11          | Cameroon           | <i>Analyse situationnelle du systeme d'information au Cameroun</i>                                                                                                                   | WHO Health Metrics Network                                                                        | <a href="http://www.who.int/healthmetrics/en/">http://www.who.int/healthmetrics/en/</a>                                                                                                                                                                                                         | 2007 |
| 17          | 12          | Canada             | <i>Spending and health workforce</i>                                                                                                                                                 | Canadian Institute for Health Information                                                         | <a href="http://secure.cihi.ca/cihiweb/dispPage.jsp?cw_page=hhrdata_e">http://secure.cihi.ca/cihiweb/dispPage.jsp?cw_page=hhrdata_e</a>                                                                                                                                                         | 2010 |
| 18          | 13          | China              | <i>Health Metrics Network, China Health Information System Review and Assessment</i>                                                                                                 | WHO Health Metrics Network                                                                        | <a href="http://www.who.int/healthmetrics/en/">http://www.who.int/healthmetrics/en/</a>                                                                                                                                                                                                         | 2006 |
| 19          | 13          | China              | <i>China's Human resources for health: quantity, quality and distribution</i>                                                                                                        | Anand S, Fan VY, Zhang J, Zhang L, Ke Y, Dong Z, Chen LC                                          | <i>Lancet</i> 2008; 372: 1774-1781 <a href="http://www.thelancet.com/journals/lancet/article/PIIS0140-6736(08)61363-X/abstract">http://www.thelancet.com/journals/lancet/article/PIIS0140-6736(08)61363-X/abstract</a>                                                                          | 2008 |
| 20          | 14          | Costa Rica         | <i>Basic Data on Human Resources in the Health Sector in Costa Rica</i>                                                                                                              | Observatory of Human Resources in the Health Sector Reforms, PAHO, WHO                            | <a href="http://www.observatoriorh.org/eng/basic_data.html">www.observatoriorh.org/eng/basic_data.html</a>                                                                                                                                                                                      | 2000 |
| 21          | 14          | Costa Rica         | <i>Costa Rica Health System Profile</i>                                                                                                                                              | PAHO, WHO                                                                                         | <a href="http://www.lachealthsys.org/index.php?option=com_docman&amp;task=cat_view&amp;gid=63&amp;Itemid=99999999">http://www.lachealthsys.org/index.php?option=com_docman&amp;task=cat_view&amp;gid=63&amp;Itemid=99999999</a>                                                                 | 2002 |
| 22          | 15          | Cote d'Ivoire      | <i>Comprehensive Assessment of Human Resources for Health in Côte d'Ivoire</i>                                                                                                       | Butera D, Fieno JV, Diarra SD, Kombe G, Decker C, Oulai S, Partners for Health Reform Plus, USAID | <a href="http://www.hrresourcecenter.org/node/543">http://www.hrresourcecenter.org/node/543</a>                                                                                                                                                                                                 | 2005 |
| 23          | 15          | Cote d'Ivoire      | <i>Rapport d'Evaluation du Systeme National d'Information Sanitaire Ivoirien par l'outil du Resau de Metrologie Sanitaire RMS/HMN</i>                                                | WHO Health Metrics Network                                                                        | <a href="http://www.who.int/healthmetrics/en/">http://www.who.int/healthmetrics/en/</a>                                                                                                                                                                                                         | 2009 |
| 24          | 16          | Dominican Republic | <i>Dominican Republic Health System Profile</i>                                                                                                                                      | PAHO, WHO and USAID                                                                               | <a href="http://www.lachealthsys.org/index.php?option=com_docman&amp;task=cat_view&amp;gid=63&amp;Itemid=99999999">http://www.lachealthsys.org/index.php?option=com_docman&amp;task=cat_view&amp;gid=63&amp;Itemid=99999999</a>                                                                 | 2007 |
| 25          | 16          | Dominican Republic | <i>Report for the Observatory of Human Resources in Health in the Dominican Republic</i>                                                                                             | PAHO, WHO                                                                                         | <a href="http://www.observatoriorh.org/eng/basic_data.html">www.observatoriorh.org/eng/basic_data.html</a>                                                                                                                                                                                      | 2001 |
| 26          | 17          | El Salvador        | <i>Compilation of Basic Data about Human Resources for Health</i>                                                                                                                    | WHO Health Metrics Network                                                                        | <a href="http://www.who.int/healthmetrics/en/">http://www.who.int/healthmetrics/en/</a>                                                                                                                                                                                                         | 2008 |

| Article no. | Country no. | Country   | Title                                                                                                                                                                   | Author/Publisher                                                                                  | Source                                                                                                                                                                                                                                          | Year |
|-------------|-------------|-----------|-------------------------------------------------------------------------------------------------------------------------------------------------------------------------|---------------------------------------------------------------------------------------------------|-------------------------------------------------------------------------------------------------------------------------------------------------------------------------------------------------------------------------------------------------|------|
| 27          | 18          | Eritrea   | <i>Eritrea Health Information System Assessment Report</i>                                                                                                              | WHO Health Metrics Network                                                                        | <a href="http://www.who.int/healthmetrics/en/">http://www.who.int/healthmetrics/en/</a>                                                                                                                                                         | 2007 |
| 28          | 19          | Ethiopia  | <i>Country Case Study: Ethiopia's Human Resources for Health Program</i>                                                                                                | Global Health Workforce Alliance, WHO                                                             | <a href="http://www.who.int/workforcealliance/knowledge/case_studies/Ethiopia.pdf">http://www.who.int/workforcealliance/knowledge/case_studies/Ethiopia.pdf</a>                                                                                 | n.d. |
| 29          | 19          | Ethiopia  | <i>Assessment of the Ethiopian National Health Information System Final Report</i>                                                                                      | WHO Health Metrics Network                                                                        | <a href="http://www.who.int/healthmetrics/en/">http://www.who.int/healthmetrics/en/</a>                                                                                                                                                         | n.d. |
| 30          | 20          | Gambia    | <i>Health Metrics Network The Gambia Health Information System</i>                                                                                                      | WHO Health Metrics Network                                                                        | <a href="http://www.who.int/healthmetrics/en/">http://www.who.int/healthmetrics/en/</a>                                                                                                                                                         | 2007 |
| 31          | 21          | Georgia   | <i>Health Information System Assessment in Georgia using Health Metrics Network Framework and Health Information System Situation Analysis Tool</i>                     | WHO Health Metrics Network                                                                        | <a href="http://www.who.int/healthmetrics/en/">http://www.who.int/healthmetrics/en/</a>                                                                                                                                                         | 2006 |
| 32          | 22          | Ghana     | <i>Ghana implementing a national human resources for health plan</i>                                                                                                    | Global Health Workforce Alliance, WHO                                                             | <a href="http://www.who.int/workforcealliance/knowledge/case_studies/Ghana.pdf">http://www.who.int/workforcealliance/knowledge/case_studies/Ghana.pdf</a>                                                                                       | 2008 |
| 33          | 22          | Ghana     | <i>Ghana Health Information System: Sub-National Health Information System Assessment</i>                                                                               | WHO Health Metrics Network                                                                        | <a href="http://www.who.int/healthmetrics/en/">http://www.who.int/healthmetrics/en/</a>                                                                                                                                                         | 2006 |
| 34          | 23          | India     | <i>'By papers and pens, you can only do so much': views about accountability and human resource management from Indian government health administrators and workers</i> | Asha, George                                                                                      | <i>Int J Health Plann Manage</i> 2009; 24:205-224.                                                                                                                                                                                              | 2009 |
| 35          | 23          | India     | <i>Not Enough Here....Too many there...Health Workforce in India (WHO)</i>                                                                                              | World Health Organization Country Office for India                                                | <a href="http://www.whoindia.org/LinkFiles/Human_Resources_Health_Workforce_in_India_-_Apr07.pdf">http://www.whoindia.org/LinkFiles/Human_Resources_Health_Workforce_in_India_-_Apr07.pdf</a>                                                   | 2007 |
| 36          | 23          | India     | <i>Health Human Resources</i>                                                                                                                                           | Government of India. Central Bureau of Health Intelligence. Ministry of Health and Family Welfare | <i>National Health Profile (NHP) of India</i> ; <a href="http://cbhidghs.nic.in/writereaddata/linkimages/Health%20Human%20Resources4484269844.pdf">http://cbhidghs.nic.in/writereaddata/linkimages/Health%20Human%20Resources4484269844.pdf</a> | 2007 |
| 37          | 23          | India     | <i>India's Health Workforce: Size, Composition, and Distribution.</i>                                                                                                   | Rao K, Bhatnagar A, Berman, P et al. Public Health Foundation of India, World Bank                | <a href="http://phfirc.org/hrhindia.org/assets/images/Paper-I.pdf">http://phfirc.org/hrhindia.org/assets/images/Paper-I.pdf</a>                                                                                                                 | 2008 |
| 38          | 24          | Indonesia | <i>Indonesia Health Information System Review and Assessment</i>                                                                                                        | WHO Health Metrics Network                                                                        | <a href="http://www.who.int/healthmetrics/en/">http://www.who.int/healthmetrics/en/</a>                                                                                                                                                         | 2007 |
| 39          | 25          | Ireland   | <i>Nursing Human Resources in Ireland: Case Study</i>                                                                                                                   | Buchan J, International Centre for Human Resources in Nursing                                     | <a href="http://www.ichrn.com/publications/casestudies/Ireland_CaseStudy_aug-11-08-EN.pdf">http://www.ichrn.com/publications/casestudies/Ireland_CaseStudy_aug-11-08-EN.pdf</a>                                                                 | 2009 |
| 40          | 26          | Kenya     | <i>Developing a nursing database system in Kenya</i>                                                                                                                    | Riley PL, Vindigni SM, Arudo J, et al.                                                            | <i>Health Serv Res</i> 2007, 42:1389-1405. <a href="http://www.ncbi.nlm.nih.gov/pmc/articles/PMC1955370/pdf/hesr0042-1389.pdf">http://www.ncbi.nlm.nih.gov/pmc/articles/PMC1955370/pdf/hesr0042-1389.pdf</a>                                    | 2007 |
| 41          | 26          | Kenya     | <i>Report for the Assessment of the Health Information System of Kenya</i>                                                                                              | WHO Health Metrics Network                                                                        | <a href="http://www.who.int/healthmetrics/en/">http://www.who.int/healthmetrics/en/</a>                                                                                                                                                         | 2008 |
| 42          | 26          | Kenya     | <i>Rising to the Challenges of Human Resources for Health in Kenya: Developing Empirical Evidence for Policy Making</i>                                                 | Chankova S, Kombe G, Muchiri S, et al. Abt Associates, USAID                                      | HRH Global Resource Center <a href="http://www.hrhresourcecenter.org/node/592">http://www.hrhresourcecenter.org/node/592</a>                                                                                                                    | 2006 |
| 43          | 26          | Kenya     | <i>HR mapping of the health sector in Kenya: the foundation for effective HR management</i>                                                                             | James J, Muchiri S, Kenya Ministry of Health                                                      | HLSP Institute and Ministry of Health, Kenya. Human Resources for Health Global Resource Center. <a href="http://www.hrhresourcecenter.org/node/869">http://www.hrhresourcecenter.org/node/869</a>                                              | 2006 |
| 44          | 27          | Kyrgyz    | <i>Kyrgyz Republic Health Information system: Review and assessment</i>                                                                                                 | WHO Health Metrics Network                                                                        | <a href="http://www.who.int/healthmetrics/en/">http://www.who.int/healthmetrics/en/</a>                                                                                                                                                         | 2007 |
| 45          | 28          | Laos      | <i>Lao Health Information System: Review and Assessment</i>                                                                                                             | WHO Health Metrics Network                                                                        | <a href="http://www.who.int/healthmetrics/en/">http://www.who.int/healthmetrics/en/</a>                                                                                                                                                         | 2006 |
| 46          | 29          | Lesotho   | <i>Health Metrics Network Lesotho Health Information System Review and Assessment</i>                                                                                   | WHO Health Metrics Network                                                                        | <a href="http://www.who.int/healthmetrics/en/">http://www.who.int/healthmetrics/en/</a>                                                                                                                                                         | 2007 |
| 47          | 30          | Malawi    | <i>Human Resources - Capacity Development within the Health Sector Needs Assessment Study</i>                                                                           | Republic of Malawi, Ministry of Health, Malawi Health SWAp Donor Group, GTZ                       | <a href="http://www.scotland-malawipartnership.org/documents/37-Malawi_Health_SWAp-Needs_Assessment_GTZ_Final_Report.pdf">http://www.scotland-malawipartnership.org/documents/37-Malawi_Health_SWAp-Needs_Assessment_GTZ_Final_Report.pdf</a>   | 2007 |
| 48          | 30          | Malawi    | <i>Human Resources and Financing for the Health Sector in Malawi</i>                                                                                                    | Africa Human Development, Africa Region, World Bank, Ministry of Health Malawi                    | HRH Global Resource Center, <a href="http://www.hrhresourcecenter.org/node/2563">http://www.hrhresourcecenter.org/node/2563</a>                                                                                                                 | 2010 |
| 49          | 30          | Malawi    | <i>Malawi Human Resources Information System</i>                                                                                                                        | Schenck-Yglesias C, JHPIEGO                                                                       | HRH Global Resource Center, <a href="http://www.hrhresourcecenter.org/node/706">http://www.hrhresourcecenter.org/node/706</a> <a href="http://pdf.usaid.gov/pdf_docs/PNACX173.pdf">http://pdf.usaid.gov/pdf_docs/PNACX173.pdf</a>               | 2004 |
| 50          | 30          | Malawi    | <i>Country case study. Malawi's Emergency Human Resources Program</i>                                                                                                   | Global Health Workforce Alliance, WHO                                                             | <a href="http://www.who.int/workforcealliance/knowledge/case_studies/Malawi.pdf">http://www.who.int/workforcealliance/knowledge/case_studies/Malawi.pdf</a>                                                                                     | 2008 |
| 51          | 31          | Mali      | <i>Rapport d'évaluation du système national d'information sanitaire par l'outil du réseau de métrologie sanitaire</i>                                                   | WHO Health Metrics Network                                                                        | <a href="http://www.who.int/healthmetrics/en/">http://www.who.int/healthmetrics/en/</a>                                                                                                                                                         | 2008 |
| 52          | 32          | Mauritius | <i>Mauritius Health Information System Development Strategy and Plan</i>                                                                                                | WHO Health Metrics Network                                                                        | <a href="http://www.who.int/healthmetrics/en/">http://www.who.int/healthmetrics/en/</a>                                                                                                                                                         | 2008 |

| Article no. | Country no. | Country          | Title                                                                                                                                        | Author/Publisher                                                                                                 | Source                                                                                                                                                                                                                                                                                      | Year |
|-------------|-------------|------------------|----------------------------------------------------------------------------------------------------------------------------------------------|------------------------------------------------------------------------------------------------------------------|---------------------------------------------------------------------------------------------------------------------------------------------------------------------------------------------------------------------------------------------------------------------------------------------|------|
| 53          | 33          | Mexico           | <i>Salud en las Americas, 2007. Volumen II- Paises.</i>                                                                                      | SALUD EN LAS AMÉRICAS, 2007.VOLUMEN II-PAÍSES                                                                    | <a href="http://www.mex.ops-oms.org/documentos/publicaciones/MéxicoSpanish.pdf">www.mex.ops-oms.org/documentos/publicaciones/MéxicoSpanish.pdf</a>                                                                                                                                          | 2007 |
| 54          | 34          | Moldova          | <i>The evaluation of the Health Information System in the Republic of Moldova</i>                                                            | WHO Health Metrics Network                                                                                       | <a href="http://www.who.int/healthmetrics/en/">http://www.who.int/healthmetrics/en/</a>                                                                                                                                                                                                     | 2007 |
| 55          | 35          | Mongolia         | <i>Mongolia Health Information System: Assessment Report</i>                                                                                 | WHO Health Metrics Network                                                                                       | <a href="http://www.who.int/healthmetrics/en/">http://www.who.int/healthmetrics/en/</a>                                                                                                                                                                                                     | 2007 |
| 56          | 36          | Mozambique       | <i>Mozambique Ministry of Health - descriptions of SIFo (subsystem of training information) and SIP (subsystem of personnel information)</i> | Mozambique Ministry of Health                                                                                    | <a href="http://www.misau.gov.mz/pt/misau/drh_direccao_de_recursos_humanos">http://www.misau.gov.mz/pt/misau/drh_direccao_de_recursos_humanos</a>                                                                                                                                           | 2009 |
| 57          | 37          | Myanmar          | <i>Myanmar Health Information System: Review and Assessment</i>                                                                              | WHO Health Metrics Network                                                                                       | <a href="http://www.who.int/healthmetrics/en/">http://www.who.int/healthmetrics/en/</a>                                                                                                                                                                                                     | 2007 |
| 58          | 38          | Namibia          | <i>Namibia Health Information System Profile and Assessment</i>                                                                              | WHO Health Metrics Network                                                                                       | <a href="http://www.who.int/healthmetrics/en/">http://www.who.int/healthmetrics/en/</a>                                                                                                                                                                                                     | 2005 |
| 59          | 39          | Nicaragua        | <i>Diagnostico de situacion sistema de informacion en salud</i>                                                                              | WHO Health Metrics Network                                                                                       | <a href="http://www.who.int/healthmetrics/en/">http://www.who.int/healthmetrics/en/</a>                                                                                                                                                                                                     | 2007 |
| 60          | 40          | Nigeria          | <i>Health workforce country profile for Nigeria</i>                                                                                          | Africa Health Workforce Observatory, WHO                                                                         | <a href="http://www.afro.who.int/hrh-observatory/country_information/countryprofiles/Nigeria_HRH_Country_Profile_2008.pdf">http://www.afro.who.int/hrh-observatory/country_information/countryprofiles/Nigeria_HRH_Country_Profile_2008.pdf</a>                                             | 2008 |
| 61          | 40          | Nigeria          | <i>A Situation Assessment of Human Resources in the Public Health Sector in Nigeria</i>                                                      | Chankova S, Nguyen H, Chipanta D, et al, Federal Government of Nigeria and Partners for Health ReformPlus, USAID | HRH Global Resource Center, <a href="http://www.hrhresourcecenter.org/node/1007">http://www.hrhresourcecenter.org/node/1007</a>                                                                                                                                                             | 2006 |
| 62          | 41          | Oman             | <i>Human resources for health in the Sultanate of Oman</i>                                                                                   | Ministry of Health, Sultanate of Oman                                                                            | <a href="http://www.emro.who.int/hrh-obs/media/pdf/oma_hrh_08.pdf">http://www.emro.who.int/hrh-obs/media/pdf/oma_hrh_08.pdf</a>                                                                                                                                                             | 2008 |
| 63          | 42          | Palestine        | <i>Human resources for health in Palestine: a policy analysis. Part I: Current situation and recent developments.</i>                        | Hamdan M, Defever M                                                                                              | <i>Health Policy</i> 2003, 64:243-259                                                                                                                                                                                                                                                       | 2003 |
| 64          | 42          | Palestine        | <i>Human resources for health in Palestine: a policy analysis. Part II. The process of policy formulation and implementation.</i>            | Hamdan M, Defever M                                                                                              | <i>Health Policy</i> 2003, 64,2:261-273                                                                                                                                                                                                                                                     | 2003 |
| 65          | 43          | Papua New Guinea | <i>Information systems for health sector monitoring in Papua New Guinea</i>                                                                  | Cibulskis RE, Hiawalyer G                                                                                        | <i>Bull World Health Organ</i> 2002;80:752-758. <a href="http://www.ncbi.nlm.nih.gov/pmc/articles/PMC2567603/pdf/12378295.pdf">http://www.ncbi.nlm.nih.gov/pmc/articles/PMC2567603/pdf/12378295.pdf</a>                                                                                     | 2002 |
| 66          | 44          | Paraguay         | <i>Situational Study of Human Resources in Paraguay</i>                                                                                      | Paraguay Ministry of Public Health and Social Welfare                                                            | <a href="http://www.observatoriorh.org/esp/docs/datos-de-paraguay.doc">www.observatoriorh.org/esp/docs/datos-de-paraguay.doc</a>                                                                                                                                                            | 2000 |
| 67          | 45          | Philippines      | <i>Philippine Health Information System: Review and Assessment</i>                                                                           | WHO Health Metrics Network                                                                                       | <a href="http://www.who.int/healthmetrics/en/">http://www.who.int/healthmetrics/en/</a>                                                                                                                                                                                                     | 2007 |
| 68          | 46          | Portugal         | <i>The state of the health workforce in Portugal</i>                                                                                         | Biscaia, Andre; Martins, Jose; Carolo Margarida                                                                  | <i>Cah. Socio. Demo. Med.</i> 47: 257-272.                                                                                                                                                                                                                                                  | 2009 |
| 69          | 47          | Rwanda           | <i>Evaluation of the Capacity Project's Human Resource Information Systems Strengthening Process in Swaziland, Uganda, and Rwanda</i>        | de Vries D, Blair G, Morgan Kairie, The Capacity Project, USAID                                                  | HRH Global Resource Center <a href="http://www.hrhresourcecenter.org/node/2944">http://www.hrhresourcecenter.org/node/2944</a>                                                                                                                                                              | 2009 |
| 70          | 48          | Senegal          | <i>Rapport d'évaluation du système d'information sanitaire au Senegal</i>                                                                    | WHO Health Metrics Network                                                                                       | <a href="http://www.who.int/healthmetrics/en/">http://www.who.int/healthmetrics/en/</a>                                                                                                                                                                                                     | 2007 |
| 71          | 49          | Sierra Leone     | <i>Report on an Assessment of the Sierre Leone Health Information System</i>                                                                 | WHO Health Metrics Network                                                                                       | <a href="http://www.who.int/healthmetrics/en/">http://www.who.int/healthmetrics/en/</a>                                                                                                                                                                                                     | 2006 |
| 72          | 50          | South Africa     | <i>Assessment of the health information system in South Africa</i>                                                                           | WHO Health Metrics Network                                                                                       | <a href="http://www.who.int/healthmetrics/en/">http://www.who.int/healthmetrics/en/</a>                                                                                                                                                                                                     | 2009 |
| 73          | 51          | Sudan            | <i>Sudan Health Information System: Review and Assessment</i>                                                                                | WHO Health Metrics Network                                                                                       | <a href="http://www.who.int/healthmetrics/en/">http://www.who.int/healthmetrics/en/</a>                                                                                                                                                                                                     | 2007 |
| 74          | 51          | Sudan            | <i>Mapping of Human Resources for Health: Final report</i>                                                                                   | Bushara I, Badr ES, Federal Ministry of Health Sudan                                                             | <a href="http://www.emro.who.int/sudan/pdf/Mapping%20of%20HRH%20Sudan.pdf">http://www.emro.who.int/sudan/pdf/Mapping%20of%20HRH%20Sudan.pdf</a>                                                                                                                                             | 2005 |
| 75          | 52          | Suriname         | <i>Assessment of the Suriname Health Information Systems</i>                                                                                 | Crape B (ed), Suriname Ministry of Health, PAHO, WHO                                                             | <a href="http://www.paho.org/English/DD/AIS/surreport.pdf">www.paho.org/English/DD/AIS/surreport.pdf</a>                                                                                                                                                                                    | 2007 |
| 76          | 53          | Swaziland        | <i>Swaziland Health Information System: Review and Assessment</i>                                                                            | WHO Health Metrics Network                                                                                       | <a href="http://www.who.int/healthmetrics/en/">http://www.who.int/healthmetrics/en/</a>                                                                                                                                                                                                     | 2007 |
| 69*         | 53          | Swaziland        | <i>Evaluation of the Capacity Project's Human Resource Information Systems Strengthening Process in Swaziland, Uganda, and Rwanda</i>        | de Vries D, Blair G, Morgan Kairie, The Capacity Project, USAID                                                  | HRH Global Resource Center <a href="http://www.hrhresourcecenter.org/node/2944">http://www.hrhresourcecenter.org/node/2944</a>                                                                                                                                                              | 2009 |
| 77          | 54          | Tajikistan       | <i>The assessment of the health information system in Tajikistan</i>                                                                         | WHO Health Metrics Network                                                                                       | <a href="http://www.who.int/healthmetrics/en/">http://www.who.int/healthmetrics/en/</a>                                                                                                                                                                                                     | 2009 |
| 78          | 55          | Tanzania         | <i>Health Sector Performance Profile Report (2009)</i>                                                                                       | Ministry of Health and Social Welfare                                                                            | <a href="http://hdptz.esealtd.com/fileadmin/documents/Other_Health_Meetings/Health_Sector_Performance_Profile_Report_2009_4_Nov_FINAL_DRAFT.pdf">http://hdptz.esealtd.com/fileadmin/documents/Other_Health_Meetings/Health_Sector_Performance_Profile_Report_2009_4_Nov_FINAL_DRAFT.pdf</a> | 2007 |
| 79          | 55          | Tanzania         | <i>Assessment of the country of health information system in Tanzania</i>                                                                    | WHO Health Metrics Network                                                                                       | <a href="http://www.who.int/healthmetrics/en/">http://www.who.int/healthmetrics/en/</a>                                                                                                                                                                                                     | 2007 |

| Article no. | Country no. | Country                                  | Title                                                                                                                                 | Author/Publisher                                                                                                                          | Source                                                                                                                                                                                                        | Year |
|-------------|-------------|------------------------------------------|---------------------------------------------------------------------------------------------------------------------------------------|-------------------------------------------------------------------------------------------------------------------------------------------|---------------------------------------------------------------------------------------------------------------------------------------------------------------------------------------------------------------|------|
| 80          | 56          | Tunisia                                  | <i>Rapport detaille du projet de renforcement d'information sanitaire en Tunisie</i>                                                  | WHO Health Metrics Network                                                                                                                | <a href="http://www.who.int/healthmetrics/en/">http://www.who.int/healthmetrics/en/</a>                                                                                                                       | 2006 |
| 81          | 57          | Uganda                                   | <i>Assessment of the Health Information System in Uganda</i>                                                                          | WHO Health Metrics Network                                                                                                                | <a href="http://www.who.int/healthmetrics/en/">http://www.who.int/healthmetrics/en/</a>                                                                                                                       | 2007 |
| 69*         | 57          | Uganda                                   | <i>Evaluation of the Capacity Project's Human Resource Information Systems Strengthening Process in Swaziland, Uganda, and Rwanda</i> | de Vries D, Blair G, Morgan K, The Capacity Project, USAID                                                                                | HRH Global Resource Center, <a href="http://www.hrhresourcecenter.org/node/2944">http://www.hrhresourcecenter.org/node/2944</a>                                                                               | 2009 |
| 82          | 58          | United States of America                 | <i>National Center for Health Workforce Analysis: U.S. Health Workforce Personnel Factbook</i>                                        | Observatory of Human Resources in the Health Sector Reforms, PAHO, WHO                                                                    | <a href="http://www.observatoriorh.org/eng/basic_data.html">www.observatoriorh.org/eng/basic_data.html</a>                                                                                                    | n.d. |
| 83          | 58          | United States of America                 | <i>Counting Physicians: Inconsistencies in a Commonly Used Source for Workforce Analysis</i>                                          | Freed G, Nahra T, Wheeler J; Research Advisory Committee of the American Board of Pediatrics                                              | <i>Acad Med</i> 2006, 81:847-852                                                                                                                                                                              | 2006 |
| 84          | 58          | United States of America                 | <i>Registered Nurse Survey 2004</i>                                                                                                   | Health Resources and Services Administration, Department of Health and Human Resources                                                    | <a href="ftp://ftp.hrsa.gov/bhpr/workforce/0306rnss.pdf">ftp://ftp.hrsa.gov/bhpr/workforce/0306rnss.pdf</a>                                                                                                   | 2004 |
| 85          | 58          | United States of America                 | <i>Self-Reported Physician Specialties and the Primary Care Content of Medical Practice: A Study of the AMA Physician Masterfile</i>  | Shea J, Kletke PR, Wozniak GD, et al.                                                                                                     | <i>Med Care</i> 1999, 37: 333-338. <a href="http://www.jstor.org/stable/3767442">http://www.jstor.org/stable/3767442</a>                                                                                      | 2009 |
| 86          | 58          | United States of America                 | <i>Shaping HealthWorkforce Policy Through Data-Driven Analyses: The North Carolina Health Professions Data System</i>                 | King J, Holmes M                                                                                                                          | <i>NC Med J</i> 2008, 69:139-141. <a href="http://www.shepscenter.unc.edu/research_programs/rural/publications/index.html">http://www.shepscenter.unc.edu/research_programs/rural/publications/index.html</a> | 2008 |
| 87          | 58          | United States of America                 | <i>HRSA State Health Workforce Data Resource Guide</i>                                                                                | Health Resources and Services Administration, Bureau of Health Professions, National Center for Health Workforce Information and Analysis | <a href="ftp://ftp.hrsa.gov/bhpr/workforceprofiles/guide.pdf">ftp://ftp.hrsa.gov/bhpr/workforceprofiles/guide.pdf</a>                                                                                         | n.d. |
| 88          | 58          | United States of America                 | <i>Public Health Workforce Enumeration</i>                                                                                            | Gebbie K, Raziano A, Elliott S                                                                                                            | <i>Am J Public Health</i> 2009, 99: 786-787                                                                                                                                                                   | 2009 |
| 89          | 59          | United Kingdom                           | <i>Health Sector reform and human resources: lessons from the United Kingdom</i>                                                      | Buchan J                                                                                                                                  | <i>Health Policy Plan</i> 2000, 15: 319-325                                                                                                                                                                   | 2000 |
| 90          | 60          | Vanuatu                                  | <i>Vanuatu Health Information System: Review and Assessment</i>                                                                       | WHO Health Metrics Network                                                                                                                | <a href="http://www.who.int/healthmetrics/en/">http://www.who.int/healthmetrics/en/</a>                                                                                                                       | 2007 |
| 91          | 60          | Vanuatu                                  | <i>Mapping HRH Profiles from 15 Pacific Island Countries</i>                                                                          | University of New South Wales, School of Public Health and Community Medicine.                                                            | HRH Global Resource Center <a href="http://www.hrhresourcecenter.org/node/3187">http://www.hrhresourcecenter.org/node/3187</a>                                                                                | 2009 |
| 92          | 61          | Vietnam                                  | <i>Viet Nam Health Information System Review and Assessment</i>                                                                       | WHO Health Metrics Network                                                                                                                | <a href="http://www.who.int/healthmetrics/en/">http://www.who.int/healthmetrics/en/</a>                                                                                                                       | 2006 |
| 93          | 62          | Yemen                                    | <i>Yemen Health Information System: Review and Assessment Report</i>                                                                  | WHO Health Metrics Network                                                                                                                | <a href="http://www.who.int/healthmetrics/en/">http://www.who.int/healthmetrics/en/</a>                                                                                                                       | 2007 |
| 94          | 63          | Zambia                                   | <i>Assessment of the Health Information System in Zambia</i>                                                                          | WHO Health Metrics Network                                                                                                                | <a href="http://www.who.int/healthmetrics/en/">http://www.who.int/healthmetrics/en/</a>                                                                                                                       | 2007 |
| 12*         |             | Mercosur region                          | <i>Brazil Ministry of Health - Report on Mercosur for Health Work (Annex I : data collection form for health worker database)</i>     | Brazil Ministry of Health                                                                                                                 | <a href="http://portal2.saude.gov.br/portal/arquivos/pdf/cartmercosulespanhol.pdf">http://portal2.saude.gov.br/portal/arquivos/pdf/cartmercosulespanhol.pdf</a>                                               | 2006 |
| 91*         |             | Asia-Pacific region                      | <i>Mapping HRH Profiles from 15 Pacific Island Countries</i>                                                                          | University of New South Wales, School of Public Health and Community Medicine                                                             | Human Resources for Health Knowledge Hub, HRH Global Resource Center; <a href="http://www.hrhresourcecenter.org/node/3187">http://www.hrhresourcecenter.org/node/3187</a>                                     | 2009 |
| 95          |             | Southeast Asia / Western Pacific regions | <i>WHO Minimum HRH data set</i>                                                                                                       | World Health Organization South-East Asia Region and Western Pacific Region. Sydney University of Technology                              | World Health Organization. <a href="http://www.who.int/hrh/documents/hrh_minimum_data_set.pdf">http://www.who.int/hrh/documents/hrh_minimum_data_set.pdf</a>                                                  | 2008 |
